24 **Abstract**

25 Predicting the outcome and strength of species interactions is a central goal of community  
26 ecology. Researchers have proposed that outcomes of species interactions (competitive exclusion  
27 and coexistence) are a function of both phylogenetic relatedness and functional similarity.  
28 Studies relating phylogenetic distance to competition strength have shown conflicting results.  
29 Work investigating the role of phylogenetic relatedness and functional similarity in driving  
30 competitive outcomes has been limited in terms of the breadth of taxa and ecological contexts  
31 examined, which makes the generality of these studies unclear. Consequently, we gathered 1,748  
32 pairwise competition effect sizes from 269 species and 424 unique species pairs with divergence  
33 times ranging from 1.14 to 1,275 million years and used meta-regression and model selection  
34 approaches to investigate the importance of phylogenetic relatedness and functional similarity to  
35 competition across ecological contexts. We revealed that functional similarity, but not  
36 phylogenetic relatedness, predicted the relative strength of interspecific competition (defined as  
37 the strength of interspecific competition relative to intraspecific competition). Further, we found  
38 that the presence of predators, certain habitats, increasing density of competitors, and decreasing  
39 spatial grain of experiments were all associated with more intense interspecific competition  
40 relative to intraspecific competition. Our results demonstrate that functional similarity, not  
41 phylogenetic relatedness, may explain patterns of competition-associated community assembly,  
42 highlighting the value of trait-based approaches in clarifying biotic assembly dynamics.

43 **Keywords**

44 Interspecific competition, intraspecific competition, competitive response, meta-analysis,  
45 functional similarity, phylogenetic relatedness, coexistence theory

46

47 Introduction

48 Predicting the outcomes of species interactions and community assembly and  
49 disassembly processes have long been the foci of community ecologists<sup>1</sup>. A core prediction of  
50 community ecology, originally described by Darwin<sup>2</sup>, is that closely related species will compete  
51 more strongly with each other than distantly related species, referred to as the “competition-  
52 relatedness hypothesis”<sup>3</sup>. Due in part to advances in genetics, molecular biology, and  
53 phylogenetic tools in the last 25 years, Darwin’s hypothesis has undergone repeated empirical  
54 tests. However, the generality of the relationship between phylogenetic relatedness and  
55 competition strength remains uncertain, as studies show conflicting results<sup>3–12</sup>.

56 Conflicting empirical patterns between phylogeny and competition may suggest that the  
57 assumptions underlying Darwin’s hypothesis may be flawed<sup>7</sup>. Darwin’s hypothesis assumes that  
58 phylogenetically related species are more ecologically similar than distantly related species (i.e.,  
59 phylogenetic niche conservatism)<sup>2–4,13,14</sup>. While some support exists for phylogenetic niche  
60 conservatism<sup>4,15–17</sup>, niches can evolve convergently or randomly<sup>18–20</sup>, suggesting that  
61 phylogenetically similar species may not be ecologically similar<sup>21</sup>. Darwin’s hypothesis also  
62 assumes that ecologically similar species compete more strongly than less similar species,  
63 because they share similar niches<sup>2–4,13,14</sup>. However, niche differences (i.e., degree of niche  
64 overlap) alone may not predict competition strength; rather, competitive ability differences (i.e.,  
65 differences in species’ abilities to utilize shared limiting resources) may drive patterns of  
66 competitive exclusion, while niche overlap may determine whether species pairs can coexist<sup>22–24</sup>.  
67 This suggests that ecologically similar species may not inherently compete more strongly than  
68 ecologically dissimilar species. Specifically, coexistence theory predicts competitive exclusion  
69 when species with overlapping niches differ in their competitive abilities, and coexistence when

70 strong niche differentiation overcomes differences in competitive ability between species<sup>22–24</sup>.  
71 Thus, without information on both the niche and competitive ability of interacting species,  
72 successfully predicting the strength of competition remains challenging.

73 Experimental efforts to quantify factors that influence competition strength have been  
74 limited by the breadth of focal taxa<sup>25</sup> and/or the experimental and ecological contexts of  
75 observations<sup>26,27</sup>. For instance, competition strength has been shown to be higher in certain  
76 taxonomic groups and habitat types<sup>25,28</sup>. Additionally, certain experimental conditions may  
77 intensify competition between species; specifically, studies have shown that competition is  
78 stronger when predators are present<sup>26,29</sup>, under resource limitation<sup>30,31</sup>, or when experiments are  
79 conducted in mesocosms rather than natural field settings<sup>27,32</sup>. Thus, certain experimental  
80 conditions might obscure patterns among phylogenetic relatedness, functional similarity, and  
81 competition strength.

82 We propose to address a central goal in ecology by resolving the uncertainty regarding  
83 the influences of phylogenetic relatedness and functional similarity on competition. Resolving  
84 this uncertainty will improve predictions concerning the outcome of species interactions and  
85 increase understanding of biotic mechanisms involved in the assembly and structuring of  
86 communities<sup>33–37</sup>. Here, we use a meta-analysis of 1,748 effect sizes of pairwise competitive  
87 interactions across a range of taxa and ecological contexts to assess whether the strength of  
88 interspecific competition relative to the strength of intraspecific competition (referred to here as  
89 competitive response<sup>38,39</sup>) is better predicted by phylogenetic relatedness or functional similarity  
90 of competing species. Competitive response represents the ability of a species to tolerate  
91 competition from other species<sup>38</sup> and translates to the long-term winners and losers of  
92 competition (i.e., a species that experiences low interspecific competition relative to intraspecific

93 competition will eventually competitively exclude a competing species that is less tolerant of  
94 interspecific competition)<sup>39</sup>. Our objectives are to: 1) investigate the relationships among  
95 phylogenetic distance (time since divergence), functional similarity (body size of focal species  
96 relative to body size of competing species), and competitive response across taxonomic groups  
97 and 2) determine the ecological and experimental contexts that may influence the response to  
98 competition. Per Darwin's competition-relatedness hypothesis<sup>2</sup>, we predict that competitive  
99 response is negatively related to phylogenetic distance (e.g., stronger relative interspecific  
100 competition in closely related species pairs) and, per coexistence theory<sup>23</sup>, we predict that  
101 competitive response is positively related to functional similarity (e.g., stronger relative  
102 interspecific competition when the focal species is smaller than the competing species; size-  
103 asymmetric competition<sup>40</sup>). Further, we hypothesize that certain ecological and experimental  
104 contexts will influence a species' response to competition. For instance, we predict that 1)  
105 resource limitation, 2) relatively high densities of the competing species, 3) the presence of  
106 predators, and 4) interactions in closed experimental systems compared to those in open, field  
107 systems will increase interspecific competition relative to intraspecific competition.

## 108 **METHODS**

109 We used Web of Science to search eight ecology journals (*American Naturalist*,  
110 *Ecological Monographs*, *Ecology*, *Journal of Animal Ecology*, *Journal of Ecology*, *Journal of*  
111 *Experimental Marine Biology and Ecology*, *Oecologia*, and *Oikos*) from 1988-2008 for the  
112 keywords 'interspecific competition' on 20 June 2008, which yielded 1,039 studies. A second  
113 search for the same keywords within the same subset of ecological journals from 2008-2020 was  
114 conducted on 3 March 2021, which yielded an additional 399 studies. In total, our searches  
115 yielded 1,438 studies. After studies were collected, they were examined to determine if they met

116 seven criteria for inclusion in our meta-analyses: 1) the study species had phylogenetic  
117 information (at the species or genus level) deposited in the TimeTree database<sup>41,42</sup>, an online  
118 comprehensive list of estimated divergence times across all the major taxonomic groups, 2) the  
119 density of at least one of the study species was manipulated experimentally, 3) the experimental  
120 design used appropriate controls (e.g., non-manipulated groups of individuals), 4) the means,  
121 variance, and sample sizes were reported or displayed (data from figures were extracted using  
122 the imageJ software<sup>43</sup>) or data were available, allowing us to calculate effect sizes (studies with  
123 single replicates were excluded from the analyses, because effect sizes could not be reliably  
124 calculated from these data), 5) clear pair-wise interactions were present in the study (e.g., species  
125 A and species B were grown together and species A was grown separately), 6) the endpoint  
126 measured was broadly applicable across different taxonomic groups (e.g., a measure of biomass,  
127 density, or survival, as opposed to a taxon-specific variable such as time to metamorphosis), and  
128 7) the species studied had published information on mean size at maturity available from the  
129 study itself, the USDA Plants Database ([www.plants.usda.gov](http://www.plants.usda.gov)), or Animal Diversity Web  
130 (<https://animaldiversity.org/>). In total, 96 studies with 1,748 effect sizes met our inclusion  
131 criteria.

132         Once studies were determined to meet the criteria for inclusion, we collected data on  
133 means, variances, sample sizes, the number of individuals of the species pairs, habitat (aquatic or  
134 terrestrial), whether the experiment also manipulated predator (or herbivore) presence and/or  
135 resource levels, the experimental venue (field or mesocosm), the spatial grain of the experiment  
136 (area or volume of study; m<sup>2</sup> or liters), and the length of experiment (days). A mesocosm venue  
137 was defined as any lab, greenhouse, or outdoor experiment conducted in a bounded and partially  
138 enclosed venue (e.g., beaker in the lab, pots in a greenhouse, outdoor aquatic tanks), and a field

139 venue was defined as any experiment conducted in a natural setting outside of an enclosed venue  
140 (e.g., managed field system, streams, forests). We calculated relative spatial grain as the log10  
141 transformation of spatial grain divided by body size of the focal species (species A).  
142 Phylogenetic relatedness was calculated as the log10 transformation of time since the divergence  
143 (mya) of the competing species (median value from TimeTree<sup>41,42</sup> recorded on 20 March 2021).  
144 We calculated relative density as the log10 transformation of ratio of the number of individuals  
145 of the focal species (species A) to the number of individuals of the competing species (species  
146 B). Functional similarity was estimated as the log10 transformation of the ratio of body size (cm)  
147 at maturity of the focal species (species A) to the body size of the competing species (species B;  
148 relative body size).

#### 149 **Effect sizes**

150 We calculated the effect sizes for the outcome of species interactions using the Delta-  
151 method-adjusted LRR (LRR<sup>Δ</sup>; equation (1)), as log response ratio (LRR) can be biased when  
152 estimating the outcome of studies with small sample sizes<sup>44</sup>.

$$153 \quad LRR^{\Delta} = \ln \left( \frac{X_T}{X_C} \right) + \frac{1}{2} \left[ \frac{(SD_T)^2}{N_T X_T^2} - \frac{(SD_C)^2}{N_C X_C^2} \right] \quad (1)$$

154 Where  $X_T$  is the mean of the treatment group (focal species grown with heterospecifics),  $X_C$  is the  
155 mean of the control group (focal species grown with conspecifics), and SD and N are the within-  
156 study standard deviations and sample sizes, respectively, of the treatment and control groups.  
157 Effective sample sizes (N) were calculated as the number of replicates multiplied by the number  
158 of individuals per replicate. Here, LRR<sup>Δ</sup> is the ratio between interspecific and intraspecific  
159 effects and can be interpreted as the competitive response of a species (ability of a species to  
160 avoid being suppressed; *sensu* refs<sup>38,39</sup>). Specifically, when LRR<sup>Δ</sup> is negative, the focal species is  
161 more responsive to interspecific effects than intraspecific effects, indicating that the species is

162 sensitive to interspecific competition and long-term competitive exclusion of the focal species  
 163 can occur<sup>39</sup>. Conversely, when  $LRR^{\Delta}$  is zero or positive, interspecific effects are equal to or less  
 164 than intraspecific effects, indicating that the species is not sensitive to interspecific competition  
 165 and the focal species may, in the long-term, competitively exclude the competing species<sup>39</sup>. As  
 166 some effect sizes within studies were calculated using the same control group and their  
 167 observations were therefore non-independent (equation (2)), we calculated variance-covariance  
 168 matrices for observations (**A** and **B** below) within studies that shared control groups using the  
 169 ‘covariance\_commonControl’ function in the ‘metagear’ R package<sup>45</sup> and adjusted per the Delta-  
 170 method<sup>44</sup>.

$$171 \quad V^{Xc}(LRR^{\Delta}) = \begin{bmatrix} \frac{(SD_C)^2}{N_C X_C^2} + \frac{(SD_T^A)^2}{N_T^A (X_T^A)^2} + \frac{1}{2} \left[ \frac{(SD_T)^4}{N_T X_T^4} + \frac{(SD_C)^4}{N_C X_C^4} \right] & \frac{(SD_C)^2}{N_C X_C^2} + \frac{1}{2} \left[ \frac{(SD_C)^4}{N_C X_C^4} \right] \\ \frac{(SD_C)^2}{N_C X_C^2} + \frac{1}{2} \left[ \frac{(SD_C)^4}{N_C X_C^4} \right] & \frac{(SD_C)^2}{N_C X_C^2} + \frac{(SD_T^B)^2}{N_T^B (X_T^B)^2} + \frac{1}{2} \left[ \frac{(SD_T)^4}{N_T X_T^4} + \frac{(SD_C)^4}{N_C X_C^4} \right] \end{bmatrix} \quad (2)$$

## 172 Statistical analyses

173 All analyses were conducted using R 4.0.3<sup>46</sup>. We used the package ‘metafor’<sup>47</sup> and the  
 174 ‘rma.mv’ function to generate mixed effects meta-regression models, described with equation  
 175 (3).

$$176 \quad y_i \sim \beta_1 m_i + \beta_2 f_i + \beta_3 d_i + \beta_4 g_i + \beta_5 s_i + \beta_6 l_i + \beta_7 h_i + \beta_8 p_i + \beta_9 r_i + \beta_{10} V_i + \dots + \gamma_1 e_i + \\ 177 \quad \gamma_2 b_i + v_i \quad (3)$$

178 Where  $y_i$  denotes the Delta-adjusted LRR and  $v_i$  denotes the Delta-adjusted LRR  
 179 variance for the  $i$ th effect size. Our effect sizes have a hierarchical structure; multiple effect sizes  
 180 exist within single experiments. To minimize the risk of Type I error associated with the  
 181 nonindependence among effect sizes that were not explained by sampling error alone<sup>48,49</sup>, we  
 182 accounted for this nonindependence by 1) including a random effects component for effect sizes  
 183 within studies ( $e$ ) and between studies ( $b$ ) and 2) estimating sampling covariance among effect



184 sizes that have shared control groups (equation (2);  $v$ ). We did not assess potential publication  
185 bias, because the nonindependence among effect sizes within a study and the resulting variance-  
186 covariance matrix invalidates these tests<sup>48,50</sup>.

187 Moderators in the mixed effects meta-analytic models included log<sub>10</sub> phylogenetic  
188 distance ( $m$ ), log<sub>10</sub> relative body size ( $f$ ), log<sub>10</sub> relative density ( $d$ ), log<sub>10</sub> relative spatial grain  
189 ( $g$ ), study endpoint (density/growth/survival;  $s$ ), log<sub>10</sub> length of experiment (days;  $l$ ) habitat  
190 (terrestrial/aquatic;  $h$ ), predators (present/absent;  $p$ ), resource level (low/ambient/high;  $r$ ), venue  
191 (field/mesocosm;  $V$ ), and all possible two-way interactions (... in equation (3); interactions  
192 between both resource and study endpoint and any other categorical moderator as well as  
193 between venue and habitat were not possible due to missing cells or highly unbalanced  
194 replication across cells). To evaluate the importance of these moderators, we performed model  
195 selection based on AIC in which we fit all possible combinations of main effects and two-way  
196 interactions as moderators using the ‘dredge’ function in the ‘MuMIn’ R package<sup>51</sup>. To prevent  
197 overfitting of models, we limited models to 8 moderators (main and interactive effects). Model  
198 weights ( $AIC_w$ ) and relative importance values (sum of  $AIC_w$  across models in which the focal  
199 moderator appears) for each moderator were calculated from models with a  $\Delta AIC \leq 4$  (see Supp.  
200 Table S1 and Supp. Fig. S1 for model weights and moderator importance values)<sup>52</sup>. To test  
201 whether continuous moderators were different from 0, we used z-tests. Similarly, to test whether  
202 categorical moderators were different from 0, we used z-tests and pairwise differences among  
203 groups within categorical moderators were evaluated with t-test contrasts. To estimate and plot  
204 marginal effects of moderators, we calculated estimated marginal means; continuous covariate  
205 moderators were held at their median values and categorical covariate moderators were averaged

206 over the proportions of the groups. Summary statistics, p-values, and figures were generated  
207 from the model with the lowest AIC.

208       Following the primary analyses described above, we examined the effect of resource  
209 limitation on endpoints for species grown with conspecific and heterospecific neighbors, by  
210 selecting the 14 studies in our database that manipulated resources (e.g., ambient and high,  
211 ambient and low, or low and high resources). In each study, for all species that were grown with  
212 both conspecific and heterospecific neighbors, we calculated the Delta-method-adjusted LRR  
213 ( $LRR^{\Delta}$ ; equation (1)) with “treatment” set as resource limitation and “control” set as higher  
214 resource conditions for each species-neighbor combination, which resulted in 150 effect sizes.  
215 As with the primary analyses, we calculated a variance-covariance matrix from equation (2) and  
216 used the ‘rma.mv’ function to generate a mixed effects meta-analysis model with random effects  
217 components for effect sizes within studies and between studies. To test whether resource  
218 limitation differentially affected inter- and intra-specific competition, we included a single  
219 moderator: the identity of the neighbor(s) of the focal species (conspecific/heterospecific).

## 220 **RESULTS**

221       We collected 1,748 effect sizes from 96 studies (involving 269 different species and 424  
222 species pairs) that met our inclusion criteria. The divergence times of the species obtained from  
223 the TimeTree database ranged from 1.14 million years ago (MYA) to 1,275 MYA, with a median  
224 divergence time of 121 MYA. Species belonged to various taxonomic groups (49.3%  
225 angiosperms, 17.2% amphibians, 11.8% arthropods, 8.1% fish, 4.1% mollusks, and 3.2%  
226 mammals, with the remainder from bryophytes, echinoderms, gymnosperms, reptiles, and  
227 rotifers), and data represent different measures of competition (88.7% growth, 8.9 % survival,  
228 and 2.4% density). Effect sizes were distributed among various ecological contexts (Fig. 1) and

229 were not different among broad taxonomic groupings of focal species (Supp. Fig. S2) or among  
230 study endpoints (Supp. Fig. S3).

231 When controlling for within- and among-study variance, model selection indicated that  
232 competitive response was negatively related to relative body size of the focal species ( $z = 3.944$ ,  
233  $p < 0.001$ ; Table 1, Fig. 2A, Supp. Fig. S4). Specifically, when the focal species was smaller than  
234 the competing species, interspecific competition was greater than intraspecific competition, but  
235 interspecific competition was less than intraspecific competition when individuals of the focal  
236 species were larger than the competing species. The magnitude of this effect increased when  
237 predators were present ( $z = 2.682$ ,  $p = 0.007$ ; Table 1, Fig. 2A, Supp. Fig. S4).

238 The presence of predators also interacted with several ecological moderators to affect the  
239 competitive response of species (Table 1). Specifically, there was an interaction between relative  
240 spatial grain of the study and the presence of predators, such that when predators were absent,  
241 there was a weak positive relationship between relative spatial grain and competitive response  
242 ( $\beta: 0.017$ ; Table 1, Fig. 2B, Supp. Fig. S5), but when predators were present, competitive  
243 response was negatively related to relative spatial grain ( $\beta: -0.191$ ; Table 1, Fig. 2B, Supp. Fig.  
244 S5). Further, predator presence interacted with habitat to affect the competitive response of  
245 species ( $z = -3.459$ ,  $p = <0.001$ ). In terrestrial habitats, the presence of predators increased  
246 competitive response (marginal  $\ln RR^\Delta = -0.78 \pm 0.53$  95% CI) relative to when predators were  
247 absent (marginal  $\ln RR^\Delta = -0.23 \pm 0.17$  95% CI; pairwise comparison,  $t = 1.966$ ,  $p = 0.049$ ; Fig.  
248 3). Conversely, in aquatic systems, the presence of predators reduced competitive response  
249 (marginal  $\ln RR^\Delta = 0.91 \pm 0.56$  95% CI) relative to when predators were absent (marginal  $\ln RR^\Delta$   
250  $= -0.25 \pm 0.21$  95% CI; pairwise comparison,  $t = -3.799$ ,  $p < 0.001$ ; Fig. 3).

251 Finally, model selection also indicated that the relative density of the focal species to the  
252 competing species was negatively related to competitive response ( $z = 3.510$ ,  $p < 0.001$ ; Table 1,  
253 Fig. 4, Supp. Fig. S6). Specifically, when densities of the focal species were less than the  
254 densities of the competing species, interspecific competition was greater than intraspecific  
255 competition, whereas the opposite was true when the densities of the focal species were greater  
256 than the densities of the competing species. Despite functional similarity and phylogenetic  
257 relatedness being positively correlated (simple linear regression:  $F_{1,422} = 11.59$ ,  $p < 0.001$ ,  $R^2 =$   
258  $0.03$ ; Supp. Fig. S7), we found no evidence that phylogenetic distance alone or when controlling  
259 for functional distance was a significant predictor of competitive response (Supp. Tables S1, S2;  
260 Supp. Fig. S1). Additionally, analysis of effect sizes comparing resource limitation on inter- and  
261 intraspecific competition indicated that resource limitation consistently intensifies competition,  
262 regardless of whether focal species were with hetero- or conspecifics (effect of resource  
263 limitation on intra- vs. inter-specific competition,  $Z = -0.01$ ,  $p = 0.88$ ; Supp. Fig. S8). Thus,  
264 resource limitation does not appear to alter the ratio of inter- to intraspecific competition  
265 (competitive response; our measure of competition strength). Rather, on average, it seems to  
266 equally intensify inter- and intraspecific competition. Finally, we found little evidence for study  
267 endpoint, study duration, or venue influencing competitive response (Supp. Table S1, Supp. Fig.  
268 S1).

## 269 **DISCUSSION**

270 Predicting the outcome of competition, and thus, the mechanisms underlying species  
271 coexistence patterns and biotic assembly processes within communities, is a core tenet of  
272 community ecology<sup>1</sup>. A long held assumption was that the strength of interspecific competition  
273 is driven by phylogenetic relatedness, with closely related species competing more strongly than

274 distantly related species<sup>2-4</sup>. Previous investigations of phylogenetic relatedness and functional  
275 similarity effects on competition strength have been limited by the breadth of focal taxa  
276 examined<sup>3,7,25</sup> and/or the experimental and ecological contexts in which observations  
277 occurred<sup>26,27</sup>. Using a meta-analysis of 1,748 effect sizes across a range of taxa and ecological  
278 contexts, we evaluated whether phylogenetic relatedness and/or functional similarity explained  
279 species' competitive responses and whether specific ecological contexts influenced the  
280 competitive response of species. Our results suggest that functional similarity, and not  
281 phylogenetic relatedness, predicts the competitive response of species (i.e., strength of  
282 interspecific competition relative to strength of intraspecific competition). Further, we found that  
283 certain ecological and experimental contexts, such as habitat, the presence of predators, relative  
284 spatial grain, and relative densities of competing species, can directly alter a species' competitive  
285 response.

286 Our findings add to an increasing number of studies that do not support Darwin's  
287 hypothesis that phylogenetic relatedness drives competition strength<sup>4,5,7,53-55</sup>, suggesting that one  
288 or both underlying assumptions of this hypothesis are invalid<sup>7</sup>. Examples of phylogenetic niche  
289 conservatism exist<sup>4,15-17</sup>, but niches can evolve convergently or randomly<sup>18-20</sup>, suggesting that  
290 phylogenetic and ecological relatedness may not always be correlated. Regardless of whether  
291 niche overlap between species pairs is related to their phylogenetic relatedness, the degree of  
292 niche overlap might not exclusively drive competition; rather, competitive ability differences  
293 (i.e., differences in species' abilities to utilize shared limiting resources) in addition to niche  
294 overlap are thought to influence the outcome of species interactions<sup>22-24</sup>. While there was some  
295 evidence for a phylogenetic signal in the functional similarity of species, phylogenetic  
296 relatedness was never a predictor of competition strength in our analyses. Therefore, our

297 findings, in conjunction with previous research<sup>6</sup>, suggest that phylogeny is not an effective  
298 predictor of the outcome of species interactions.

299 Our meta-analysis indicated that a species' competitive response is driven by functional  
300 similarity, which may be correlated with differences in competitive ability between species  
301 pairs<sup>53,56-58</sup>. Thus, we can infer that a species' competitive response (sensitivity to interspecific  
302 competition) is likely driven by that species' relative functional ability (e.g., the height of a plant  
303 species relative to its competitor), lending further credence to modern coexistence theory<sup>22-24</sup>,  
304 which, in contrast to Darwin's competition-relatedness hypothesis, posits that functional  
305 similarity drives competitive exclusion when species pairs have overlapping niches, while niche  
306 differences facilitate coexistence. While we did not explicitly test for niche differences between  
307 competing species<sup>23</sup>, species pairs within our meta-analysis were those that were likely to  
308 compete (i.e., researchers would not select species that do not compete with one another if they  
309 were interested in studying competition) and, as such, likely have some niche overlap. Therefore,  
310 to thoroughly test modern coexistence theory<sup>22-24</sup>, future research should explicitly test  
311 competitive response in an assortment of taxa across a range of both competitive ability and  
312 niche differences<sup>32</sup>.

313 While previous research suggests that certain ecological contexts can influence the  
314 effects of phylogenetic relatedness and functional similarity on competition strength<sup>3,4,6,9</sup>, we  
315 found that only the presence of predators altered the relationship between functional similarity  
316 and competitive response. Specifically, the presence of predators intensified asymmetrical  
317 competition<sup>40</sup>, such that the relative strength of interspecific competition was more responsive to  
318 the relative size differences between competing species when predators were present than when  
319 predators were absent. Aside from predators, no other ecological or experimental factors

320 influenced the relationship between functional similarity and competitive response. Nonetheless,  
321 we found evidence that certain ecological and experimental contexts may directly alter the  
322 competitive response of species.

323 Lending support to previous research showing effects of predation on competition<sup>26,29</sup>,  
324 we found evidence that the presence of predators, interacting with habitat, can influence  
325 competition strength. The interaction between predators and habitat observed here might be  
326 related to habitat productivity. Specifically, predators are hypothesized to increase competition in  
327 low productivity systems, because 1) predators reduce the range of conditions that allow for  
328 coexistence, 2) species that are well-defended from predation are likely poor at attaining  
329 resources and are likely to be outcompeted, and/or 3) traits that increase competitive ability may  
330 simultaneously increase vulnerability to predation, and, thus, these traits may be less pronounced  
331 in low productivity systems relative to high productivity systems<sup>29,59</sup>. Consistent with our results,  
332 predation pressures in terrestrial systems, which may be less productive than aquatic systems<sup>60,61</sup>,  
333 may increase interspecific competition strength, whereas predation pressures in aquatic systems  
334 may reduce or not affect the strength of interspecific competition<sup>29,59</sup>.

335 Further, we found an interaction between predators and relative spatial grain. When  
336 predators were present, but not when they were absent, competitive response was negatively  
337 related to relative spatial grain (i.e., interspecific competition was stronger than intraspecific  
338 competition in experiments with relatively larger spatial grain), suggesting that spatial refugia  
339 are a more limiting resource for the competing species when predators are present than absent<sup>29</sup>.  
340 The predator-mediated reduction of space likely increases interactions between competing  
341 species<sup>62</sup>, which, in turn, likely leads to increased interspecific competition<sup>26,29</sup> because species  
342 pairs were likely to have some degree of niche overlap.

343           As predicted, we found a relationship between competitive response and the relative  
344 density of the focal species, providing support for density-dependent competition<sup>32,63</sup>.  
345 Interspecific competition was greater than intraspecific competition across all taxa when the  
346 focal and competing species were at the same densities, suggesting that per capita interspecific  
347 competition (e.g.,  $\alpha_{ij}$  in Lotka-Volterra competition models) is generally greater than per capita  
348 intraspecific competition (e.g.,  $\alpha_{ii}$  in Lotka-Volterra competition models), in contrast to results  
349 found within plant communities<sup>32</sup>. Differences between our results and previous research<sup>32</sup> may  
350 be a product of our inclusion of animal, plant, and cross-kingdom species pairs, as opposed to  
351 only plant species pairs, and/or not explicitly estimating the Lotka-Volterra competition  
352 coefficients for these competing species<sup>32</sup>. These results also imply that total intraspecific  
353 competition pressures may be relatively strong at higher conspecific densities, providing further  
354 evidence that the density-dependent mortality observed with Janzen-Connell effects (i.e., greater  
355 mortality when conspecifics are aggregated in close proximity) may be, in part, the result of  
356 strong intraspecific competition, not just from natural enemies<sup>32,64,65</sup>. To robustly test Janzen-  
357 Connell effects, future research should attribute density-dependent mortality to both enemies and  
358 intraspecific competition<sup>64</sup>. As we found that certain experimental and ecological factors alter the  
359 relative strengths of inter- and intra-specific competition, some discrepancies across studies  
360 investigating phylogenetic relatedness and functional similarity controls on competition might be  
361 the result of differences in predator presence, habitat, relative size of the experimental venue, and  
362 relative densities of competing species. Therefore, future research must account for the influence  
363 of these experimental and ecological factors on species' competitive responses.

364           While previous research has highlighted the importance of resource availability in driving  
365 competition strength<sup>30</sup>, we found no evidence that resource availability affected species'



366 competitive responses. Rather, we found that resource limitation consistently negatively affected  
367 species endpoints, regardless of whether their competitors were hetero- or conspecifics. This  
368 result may suggest that resource limitation increases both inter- and intra-specific competition  
369 similarly, supporting previous research showing that competition strength increases as resources  
370 become limited<sup>30,31</sup>. Alternatively, this result may indicate that resource limitation reduces  
371 species performance, but because resource limitation did not affect the ratio between inter- and  
372 intraspecific competition, competition strength may be independent of resource availability<sup>66,67</sup>.  
373 To clarify the effects of resource availability on competition intensity, future research should  
374 explicitly test the strength of inter- and intraspecific competition across a range of taxa and  
375 resource levels.

376         The ability for phylogeny to predict the outcomes of species interactions and biotic  
377 assembly processes has been highly debated, with recent evidence suggesting that phylogenetic  
378 relatedness alone cannot predict patterns of species coexistence<sup>1,6,7,21,37</sup>. Here, using a meta-  
379 analysis of competitive responses across taxa and ecological contexts, we found that functional  
380 similarity, a proxy for differences in competitive ability, but not phylogenetic relatedness, was  
381 key to predicting species responses to competition, lending support for coexistence theory<sup>22,23</sup>.  
382 The lack of a phylogenetic signal in competitive response across broad taxonomic and ecological  
383 contexts found here, in conjunction with previous studies<sup>3,6,7,9</sup>, provides considerable evidence  
384 against Darwin's competition-relatedness hypothesis and, thus, against the hypothesis that  
385 phylogeny predicts the outcome of species interactions. Our results demonstrate that functional  
386 similarity may explain patterns of competition-associated community assembly, thereby  
387 highlighting the value of trait-based approaches in clarifying biotic assembly dynamics.

## 388 **ACKNOWLEDGEMENTS**

389 This study was supported by a Fern Garden Club Scholarship and Rutlish Foundation Grant to  
390 D.E.J., and a University of South Florida New Researcher Grant (RO65462) to J.R.R. We thank  
391 members of the Rohr lab for providing helpful comments for improving the manuscript.

## 392 REFERENCES

- 393 1. HilleRisLambers, J., Adler, P. B., Harpole, W. S., Levine, J. M. & Mayfield, M. M.  
394 Rethinking Community Assembly through the Lens of Coexistence Theory. *Annu. Rev.*  
395 *Ecol. Evol. Syst.* **43**, 227–248 (2012).
- 396 2. Darwin, C. *On the origin of species*. (John Murray, 1859).
- 397 3. Cahill, J. F., Kembel, S. W., Lamb, E. G. & Keddy, P. A. Does phylogenetic relatedness  
398 influence the strength of competition among vascular plants? *Perspect. Plant Ecol. Evol.*  
399 *Syst.* **10**, 41–50 (2008).
- 400 4. Violle, C., Nemergut, D. R., Pu, Z. & Jiang, L. Phylogenetic limiting similarity and  
401 competitive exclusion. *Ecol. Lett.* **14**, 782–787 (2011).
- 402 5. Best, R. J., Caulk, N. C. & Stachowicz, J. J. Trait vs. phylogenetic diversity as predictors  
403 of competition and community composition in herbivorous marine amphipods. *Ecol. Lett.*  
404 **16**, 72–80 (2013).
- 405 6. Godoy, O., Kraft, N. J. B. & Levine, J. M. Phylogenetic relatedness and the determinants  
406 of competitive outcomes. *Ecol. Lett.* **17**, 836–844 (2014).
- 407 7. Venail, P. A. *et al.* The influence of phylogenetic relatedness on species interactions  
408 among freshwater green algae in a mesocosm experiment. *J. Ecol.* **102**, 1288–1299  
409 (2014).
- 410 8. Anacker, B. L. & Strauss, S. Y. Ecological similarity is related to phylogenetic distance  
411 between species in a cross-niche field transplant experiment. *Ecology* **97**, 1807–1818  
412 (2016).
- 413 9. Barnes, D. K. A. Competition asymmetry with taxon divergence. *Proc. R. Soc. B Biol. Sci.*  
414 **270**, 557–562 (2003).
- 415 10. Kaplan, I. & Denno, R. F. Interspecific interactions in phytophagous insects revisited: A  
416 quantitative assessment of competition theory. *Ecology Letters* vol. 10 977–994 (2007).
- 417 11. Maherali, H. & Klironomos, J. N. Influence of phylogeny on fungal community assembly  
418 and ecosystem functioning. *Science (80-. )*. **316**, 1746–1748 (2007).
- 419 12. Burns, J. H. & Strauss, S. Y. More closely related species are more ecologically similar in  
420 an experimental test. *Proc. Natl. Acad. Sci. U. S. A.* **109**, 3599 (2012).
- 421 13. Webb, C. O., Ackerly, D. D., McPeck, M. A. & Donoghue, M. J. Phylogenies and  
422 community ecology. *Annual Review of Ecology and Systematics* vol. 33 475–505 (2002).
- 423 14. MacArthur, R. & Levins, R. Competition, habitat selection, and character displacement in  
424 a patchy environment. *Proc. Natl. Acad. Sci. U. S. A.* **51**, 1207–1210 (1964).
- 425 15. Wiens, J. J. & Graham, C. H. Niche conservatism: Integrating evolution, ecology, and  
426 conservation biology. *Annual Review of Ecology, Evolution, and Systematics* vol. 36 519–  
427 539 (2005).
- 428 16. Swenson, N. G., Enquist, B. J., Thompson, J. & Zimmerman, J. K. The influence of  
429 spatial and size scale on phylogenetic relatedness in tropical forest communities. *Ecology*  
430 **88**, 1770–1780 (2007).
- 431 17. Kraft, N. J. B. & Ackerly, D. D. Functional trait and phylogenetic tests of community

- 432 assembly across spatial scales in an Amazonian forest. *Ecol. Monogr.* **80**, 401–422 (2010).
- 433 18. Blomberg, S. P., Garland, T. & Ives, A. R. Testing for phylogenetic signal in comparative  
434 data: Behavioral traits are more labile. *Evolution (N. Y.)* **57**, 717–745 (2003).
- 435 19. Silvertown, J. *et al.* Absence of phylogenetic signal in the niche structure of meadow plant  
436 communities. *Proc. R. Soc. B Biol. Sci.* **273**, 39–44 (2006).
- 437 20. Losos, J. B. Phylogenetic niche conservatism, phylogenetic signal and the relationship  
438 between phylogenetic relatedness and ecological similarity among species. *Ecology*  
439 *Letters* vol. 11 995–1003 (2008).
- 440 21. Cadotte, M. W., Davies, T. J. & Peres-Neto, P. R. Why phylogenies do not always predict  
441 ecological differences. *Ecol. Monogr.* **87**, 535–551 (2017).
- 442 22. Adler, P. B., HilleRisLambers, J. & Levine, J. M. A niche for neutrality. *Ecology Letters*  
443 vol. 10 95–104 (2007).
- 444 23. Mayfield, M. M. & Levine, J. M. Opposing effects of competitive exclusion on the  
445 phylogenetic structure of communities. *Ecol. Lett.* **13**, 1085–1093 (2010).
- 446 24. Chesson, P. Mechanisms of Maintenance of Species Diversity. *Annu. Rev. Ecol. Syst.* **31**,  
447 343–366 (2000).
- 448 25. Connell, J. H. On the prevalence and relative importance of interspecific competition:  
449 evidence from field experiments. *Am. Nat.* **122**, 661–696 (1983).
- 450 26. Gurevitch, J., Morrison, J. A. & Hedges, L. V. The interaction between competition and  
451 predation: a meta-analysis of field experiments. *Am. Nat.* **155**, 435–453 (2000).
- 452 27. Skelly, D. K. Experimental venue and estimation of interaction strength. *Ecology* vol. 83  
453 2091–2101 (2002).
- 454 28. Schoener, T. W. Field experiments on interspecific competition. *Am. Nat.* **122**, 240–285  
455 (1983).
- 456 29. Chase, J. M. *et al.* The interaction between predation and competition: a review and  
457 synthesis. *Ecol. Lett.* **5**, 302–315 (2002).
- 458 30. Tilman, D. *Resource Competition and Community Structure*. (Princeton University Press,  
459 1982).
- 460 31. Wilson, S. D. & Tilman, D. Plant competition and resource availability in response to  
461 disturbance and fertilization. *Ecology* **74**, 599–611 (1993).
- 462 32. Adler, P. B. *et al.* Competition and coexistence in plant communities: intraspecific  
463 competition is stronger than interspecific competition. *Ecol. Lett.* **21**, 1319–1329 (2018).
- 464 33. Cavender-Bares, J., Kozak, K. H., Fine, P. V. A. & Kembel, S. W. The merging of  
465 community ecology and phylogenetic biology. *Ecol. Lett.* **12**, 693–715 (2009).
- 466 34. Li, S. peng *et al.* Species colonisation, not competitive exclusion, drives community  
467 overdispersion over long-term succession. *Ecol. Lett.* **18**, 964–973 (2015).
- 468 35. Connor, E. F. & Simberloff, D. The Assembly of Species Communities: Chance or  
469 Competition? *Ecology* **60**, 1132 (1979).
- 470 36. Donoghue, M. J. A phylogenetic perspective on the distribution of plant diversity. *Proc.*  
471 *Natl. Acad. Sci.* **105**, 11549–11555 (2008).
- 472 37. Gerhold, P., Cahill, J. F., Winter, M., Bartish, I. V. & Prinzing, A. Phylogenetic patterns  
473 are not proxies of community assembly mechanisms (they are far better). *Funct. Ecol.* **29**,  
474 600–614 (2015).
- 475 38. Goldberg, D. E. & Landa, K. Competitive Effect and Response: Hierarchies and  
476 Correlated Traits in the Early Stages of Competition. *J. Ecol.* **79**, 1013 (1991).
- 477 39. Hart, S. P., Freckleton, R. P. & Levine, J. M. How to quantify competitive ability. *J. Ecol.*

- 478 **106**, 1902–1909 (2018).
- 479 40. Persson, L. Asymmetrical Competition: Are Larger Animals Competitively Superior? *Am.*  
480 *Nat.* **126**, 261–266 (1985).
- 481 41. Hedges, S. B., Dudley, J. & Kumar, S. TimeTree: A public knowledge-base of divergence  
482 times among organisms. *Bioinformatics* **22**, 2971–2972 (2006).
- 483 42. Kumar, S., Stecher, G., Suleski, M. & Hedges, S. B. TimeTree: A Resource for Timelines,  
484 Timetrees, and Divergence Times. *Mol. Biol. Evol.* **34**, 1812–1819 (2017).
- 485 43. Schindelin, J., Rueden, C. T., Hiner, M. C. & Eliceiri, K. W. The ImageJ ecosystem: An  
486 open platform for biomedical image analysis. *Mol. Reprod. Dev.* **82**, 518–529 (2015).
- 487 44. Lajeunesse, M. J. Bias and correction for the log response ratio in ecological meta-  
488 analysis. *Ecology* **96**, 2056–2063 (2015).
- 489 45. Lajeunesse, M. J. Facilitating systematic reviews, data extraction and meta-analysis with  
490 the metagear package for R. *Methods Ecol. Evol.* **7**, 323–330 (2016).
- 491 46. R Core Team. R: a language and environment for statistical computing. (2019).
- 492 47. Viechtbauer, W. Conducting meta-analyses in R with the metafor. *J. Stat. Softw.* **36**, 1–48  
493 (2010).
- 494 48. Civitello, D. J. *et al.* Biodiversity inhibits parasites: Broad evidence for the dilution effect.  
495 *Proc. Natl. Acad. Sci. U. S. A.* **112**, 8667–8671 (2015).
- 496 49. Borenstein, M., Hedges, L. V., Higgins, J. P. & Rothstein, H. R. *Introduction to meta-*  
497 *analysis.* (John Wiley & Sons, 2011).
- 498 50. Lau, J., Ioannidis, J. P. A., Terrin, N., Schmid, C. H. & Olkin, I. The case of the  
499 misleading funnel plot. *Br. Med. J.* **333**, 597–600 (2006).
- 500 51. Barton, K. MuMIn: Multi-Model Inference. (2019).
- 501 52. Burnham, K. P. & Anderson, D. R. *Model Selection and Multimodel Inference: A*  
502 *Practical Information-Theoretic Approach.* (Springer-Verlag, 2002).  
503 doi:10.2307/3803117.
- 504 53. Kraft, N. J. B. *et al.* Community assembly, coexistence and the environmental filtering  
505 metaphor. *Funct. Ecol.* **29**, 592–599 (2015).
- 506 54. Lyu, S., Liu, X., Venail, P. & Zhou, S. Functional dissimilarity, not phylogenetic  
507 relatedness, determines interspecific interactions among plants in the Tibetan alpine  
508 meadows. *Oikos* **126**, 381–388 (2017).
- 509 55. Kunstler, G. *et al.* Plant functional traits have globally consistent effects on competition.  
510 *Nature* **529**, 204–207 (2016).
- 511 56. Vogt, D. R., Murrell, D. J. & Stoll, P. Testing spatial theories of plant coexistence: No  
512 consistent differences in intra- and interspecific interaction distances. *Am. Nat.* **175**, 73–84  
513 (2010).
- 514 57. Sokolovska, N., Rowe, L. & Johansson, F. Fitness and body size in mature odonates. *Ecol.*  
515 *Entomol.* **25**, 239–248 (2000).
- 516 58. Gallego, I., Venail, P. & Ibelings, B. W. Size differences predict niche and relative fitness  
517 differences between phytoplankton species but not their coexistence. *ISME J.* **13**, 1133–  
518 1143 (2019).
- 519 59. Proulx, M. & Mazumder, A. Reversal of grazing impact on plant species richness in  
520 nutrient-poor vs. nutrient-rich ecosystems. *Ecology* **79**, 2581–2592 (1998).
- 521 60. Shurin, J. B., Gruner, D. S. & Hillebrand, H. Review All wet or dried up? Real differences  
522 between aquatic and terrestrial food webs. *Proc. R. Soc. B Biol. Sci.* **273**, 1–9 (2006).
- 523 61. Pawar, S., Dell, A. I. & Savage, V. M. Dimensionality of consumer search space drives

- 524 trophic interaction strengths. *Nature* **486**, 485–489 (2012).
- 525 62. Bergström, U. & Englund, G. Estimating predation rates in experimental systems: Scale-  
526 dependent effects of aggregative behaviour. *Oikos* **97**, 251–259 (2002).
- 527 63. Kawatsu, K. & Kondoh, M. Density-dependent interspecific interactions and the  
528 complexity – stability relationship. *Proc. R. Soc. B* **285**, 20180698 (2018).
- 529 64. Song, X., Lim, J. Y., Yang, J. & Luskin, M. S. When do Janzen–Connell effects matter? A  
530 phylogenetic meta-analysis of conspecific negative distance and density dependence  
531 experiments. *Ecol. Lett.* **24**, 608–620 (2021).
- 532 65. Bagchi, R. *et al.* Testing the Janzen-Connell mechanism: pathogens cause  
533 overcompensating density dependence in a tropical tree. *Ecol. Lett.* **13**, 1262–1269 (2010).
- 534 66. Taylor, D. R., Aarssen, L. W. & Loehle, C. On the Relationship between  $r / K$  Selection  
535 and Environmental Carrying Capacity : A New Habitat Templet for Plant Life History  
536 Strategies. *Oikos* **58**, 239–250 (1990).
- 537 67. Rees, M. Competition on productivity gradients – what do we expect ? *Ecol. Lett.* **16**,  
538 291–298 (2013).
- 539

540 Table 1: Results of a mixed-effects meta-regression model from the model selection indicated  
 541 best model (lowest AIC) relating competition strength to factors including the relative size of the  
 542 focal species, relative density of the focal species, presence of predators, and habitat. Variance  
 543 estimates of the within and across study random effects are 0.390 and 0.257, respectively.

| Moderators                                 | Coefficient | 95% CI | Z-value | P-value          |
|--------------------------------------------|-------------|--------|---------|------------------|
| Grand Mean                                 | -0.239      | 0.18   | -2.607  | <b>0.009</b>     |
| Relative Body Size (log10) †               | 0.224       | 0.11   | 3.944   | <b>&lt;0.001</b> |
| Relative Density (log10) †                 | 0.234       | 0.13   | 3.510   | <b>&lt;0.001</b> |
| Relative Spatial Grain (log10) †           | 0.017       | 0.06   | 0.512   | <b>0.609</b>     |
| Predators Present                          | 0.983       | 0.44   | 4.387   | <b>&lt;0.001</b> |
| Predators Present * Relative Body Size     | 1.062       | 0.78   | 2.682   | <b>0.007</b>     |
| Predators Present * Relative Spatial Grain | -0.208      | 0.15   | -2.656  | <b>0.008</b>     |
| Terrestrial Habitat                        | 0.024       | 0.26   | 0.181   | 0.856            |
| Predators Present * Terrestrial Habitat    | -1.715      | 0.72   | -4.687  | <b>&lt;0.001</b> |

544 Notes: The average outcome of competition is indicated by the grand mean, as the coefficient  
 545 represents the pooled outcome of competition. For continuous moderators (†), bolded p-values  
 546 indicate a slope that deviates significantly from zero and the sign of the coefficient indicates the  
 547 direction of the effect. For categorical moderators, bolded p-values indicate a significant  
 548 difference from the grand mean with the coefficient indicating the direction and the estimated  
 549 mean of the category. For interactions between categorical and continuous moderators, bolded p-  
 550 values indicate a slope that deviates significantly from the continuous moderator and the sign of  
 551 the coefficient indicates the direction of the effect.  
 552

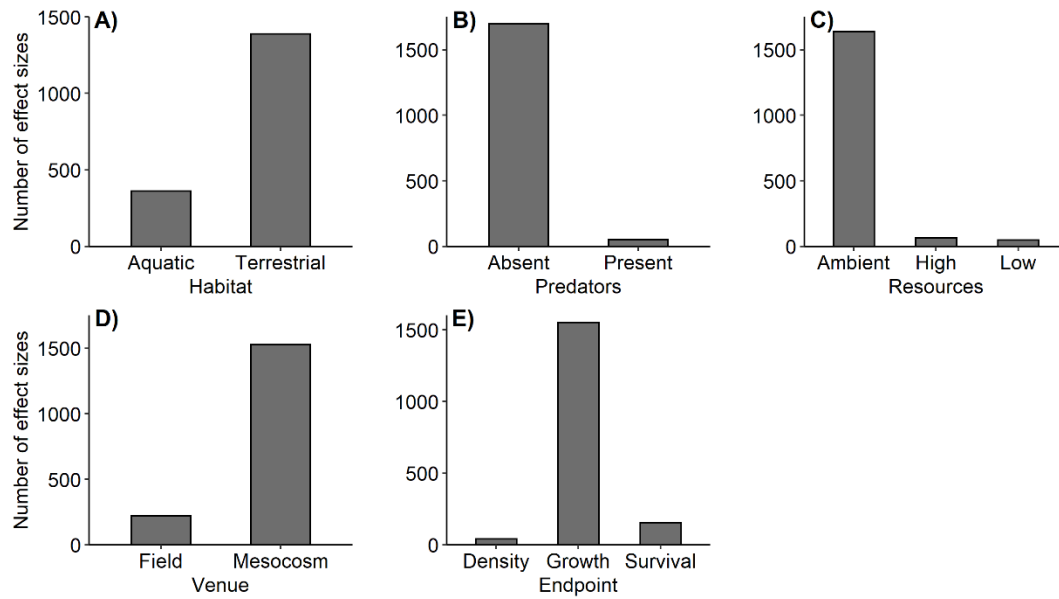

553

554 Figure 1. Representation of effect size data for different ecological contexts. Shown are a) habitat  
555 (aquatic or terrestrial), b) whether the experiment manipulated the predator presence, c) whether  
556 the experiment manipulated resource levels, d) the experimental venue (field or mesocosm), and  
557 e) the endpoint measured.

558

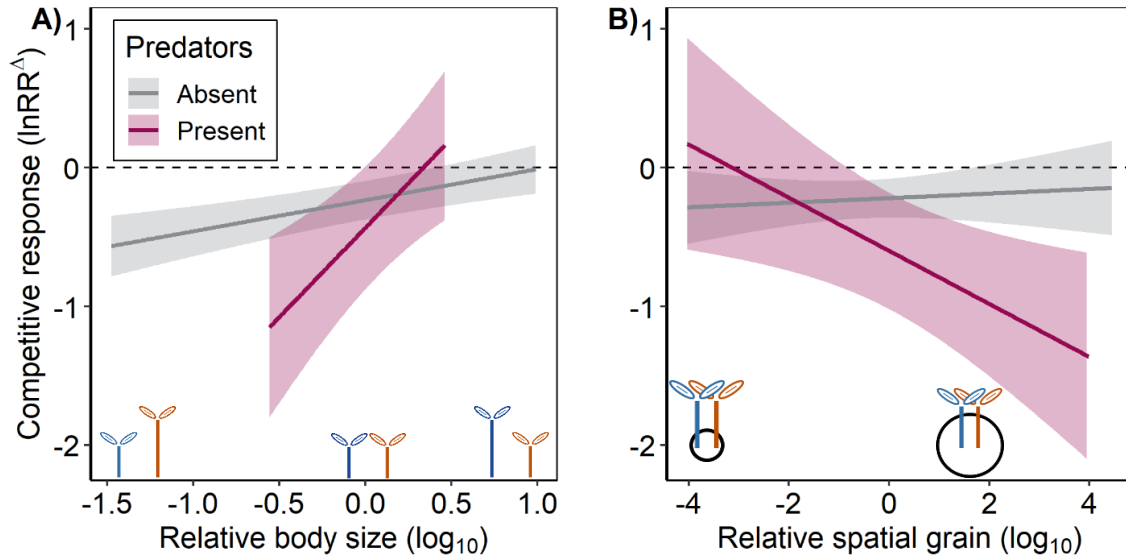

559 Figure 2. Marginal effects plot showing the interactive effects of predation and (A) relative body  
560 size (size of focal species (blue) / size of competing species (orange); functional similarity) and  
561 (B) relative spatial grain (spatial grain / size of focal species; size of black circle relative to blue  
562 individual) on the outcome of species interactions (lnRR<sup>Δ</sup>), respectively. In (A), competition  
563 strength decreases as the focal species (Sp1, blue) increased in size relative to the competing  
564 species (Sp2, orange), suggesting that relative functional differences drive competition strength.  
565 The magnitude of this effect is increased in the presence of predators. In (B), the presence of  
566 predators increases competition strength with relative spatial grain is high, but not when relative  
567 spatial grain is low, suggesting that the presence of predators may alter spatial resource use by  
568 competing species (increased aggregation) in experiments with relatively large spatial grain.  
569 Lines represent marginal effects of (A) relative body size and (B) relative spatial grain included  
570 in the mixed-effects meta-regression model and shading shows associated 95% credible bands.  
571 To estimate these marginal effects, categorical covariates from the mixed-effects meta-regression  
572 model were held at their proportional values and continuous covariates were held at their median  
573 value. Model-predicted regression lines and credible bands are shown with data points in Fig. S4  
574 and S5 in the supplement.



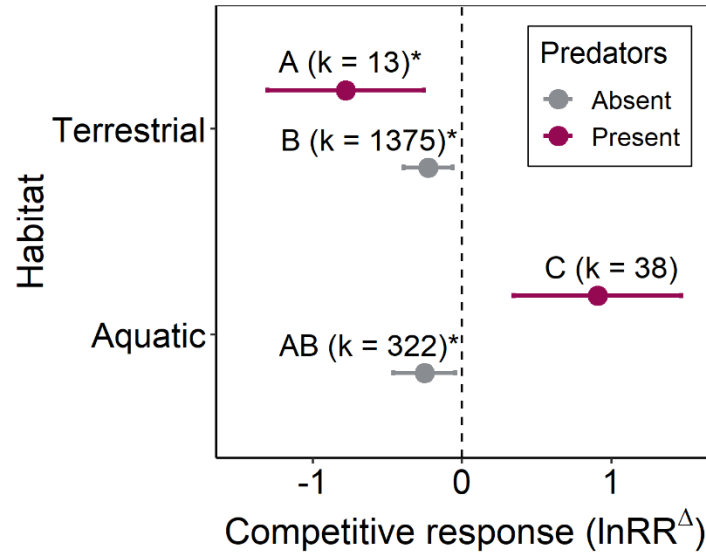

575 Figure 3. Interaction plot showing the marginal interactive effect of habitat (aquatic or terrestrial)  
576 and predators (absent or present) on competitive response. Pooled effects and errorbars (95% CI)  
577 were generated from the mixed-effects meta-regression model (see Table 1). The coloration of  
578 points and errorbars corresponds with predators (grey are predators absent and purple is  
579 predators present). Factor combinations sharing the same letter are not different from each other  
580 in pairwise comparisons. Asterisks represent factor combination estimates that are significantly  
581 different from 0. Above each estimate are counts of effect sizes for each factor combination.  
582 There are no differences in competition strength between aquatic and terrestrial habitats when  
583 predators are absent. When predators are present, competition strength increases in terrestrial  
584 habitats, but decreases in aquatic habitats. To estimate these pooled effects, continuous  
585 covariates from the mixed-effects meta-regression model were held at their median values.  
586

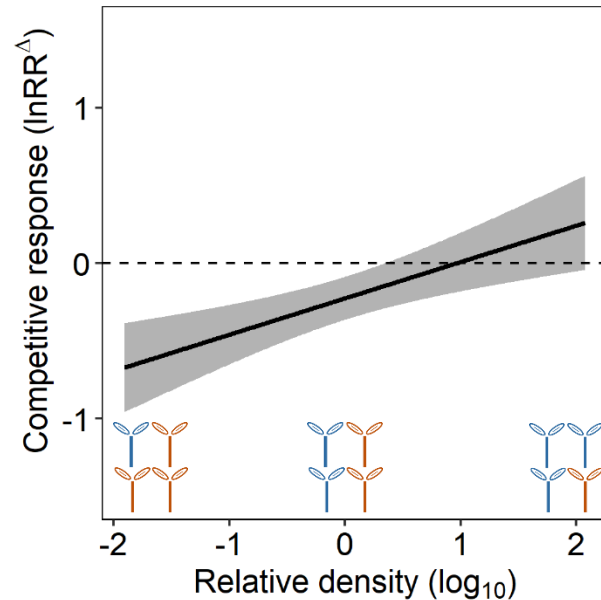

587 Figure 4. Marginal effects plot showing the effects of relative density (density of focal species  
588 (blue)/ density of competing species (orange)) on the outcome of species interactions ( $\ln RR^\Delta$ ).  
589 Competition strength decreases as the focal species (Sp1, blue) increased in density relative to  
590 the competing species (Sp2, orange), suggesting that relative densities of competing species can  
591 influence the outcome of the interaction and, thus, potentially obscure generalities from  
592 individual competition studies. Lines represent marginal effects of relative density included in  
593 the mixed-effects meta-regression model and shading shows associated 95% credible bands. To  
594 estimate these marginal effects, categorical covariates from the mixed-effects meta-regression  
595 model were held at their proportional values and continuous covariates were held at their median  
596 value. Model-predicted regression line and credible band are shown with data points in Fig. S6 in  
597 the supplement.
